## CORRECTION

# Correction: Machine learning using intrinsic genomic signatures for rapid classification of novel pathogens: COVID-19 case study

The *PLOS ONE* Staff

## Notice of republication

This article was republished on May 15, 2020, to correct errors in the figure captions that were introduced during the typesetting process. The publisher apologizes for the errors. Please download this article again to view the correct version.

## Reference

1. Randhawa GS, Soltysiak MPM, El Roz H, de Souza CPE, Hill KA, Kari L (2020) Machine learning using intrinsic genomic signatures for rapid classification of novel pathogens: COVID-19 case study. *PLoS ONE* 15(4): e0232391. <https://doi.org/10.1371/journal.pone.0232391> PMID: 32330208

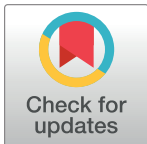

## OPEN ACCESS

**Citation:** The *PLOS ONE* Staff (2021) Correction: Machine learning using intrinsic genomic signatures for rapid classification of novel pathogens: COVID-19 case study. *PLoS ONE* 16(1): e0246465. <https://doi.org/10.1371/journal.pone.0246465>

**Published:** January 27, 2021

**Copyright:** © 2021 The PLOS ONE Staff. This is an open access article distributed under the terms of the [Creative Commons Attribution License](https://creativecommons.org/licenses/by/4.0/), which permits unrestricted use, distribution, and reproduction in any medium, provided the original author and source are credited.
